# Supplementary material for: Skewed X-chromosome inactivation in women with idiopathic intellectual disability as indicative of pathogenic variants
Source: Research Square preprint supplement (doi:10.21203/rs.3.rs-1859222/v1), 2022-08-03
Supplement: Supplementary file 1 [file 6eb93e12c3e21dd4294ba63c.docx]

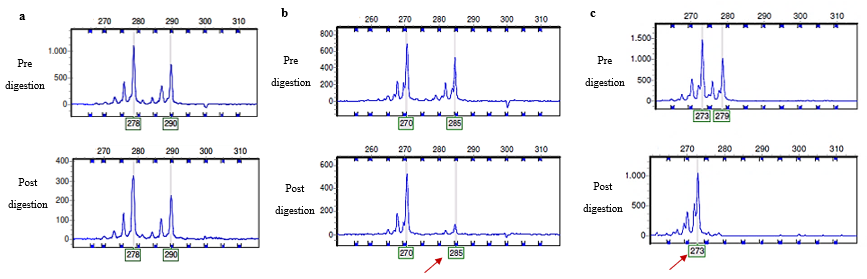


*Supplementary Figure 1. Types of X-chromosome inactivation identified in the cohort.*

*(a) Heterozygous females with random X chromosome inactivation (50:50); it is possible to visualize both allele peaks in the pre- and postdigestion analyses; however, the height difference between the postdigestion peaks indicates that one of the chromosomes is preferentially active (blue arrow).*

*(b) Heterozygous females with skewed X chromosome inactivation (90:10); it is possible to visualize both allele peaks in the pre- and postdigestion analyses; however, the height difference between the postdigestion peaks indicates that one of the chromosomes is preferentially active (red arrow).*

*(c) Heterozygous female with a complete skewing of the X chromosome inactivation (100:0); both allele peaks are visible in the pre-digestion analysis, but only one peak is present in the post-digestion analysis, representing the allele located in the inactive X chromosome (red arrow).*

*Figure SEQ Figura \* ARABIC 2. Sanger sequencing for variant validation plus segregation analyses. In all cases, the variant was validated in heterozygous state (a-h). In three cases, parents were not available (a-c). In five cases, Sanger sequencing was performed in genomic samples of the trio (proband, mother and father) for validation and segregation analysis, and all variants were de novo (d-h).*
